# Supplementary material for: Valence mediated tunable magnetism and electronic properties by ferroelectric polarization switching in 2D FeI2/In2Se3 van der Waals heterostructures
Source: Royal Society of Chemistry journal article supplement (doi:10.1039/c9nr01510h), 2019-01-01
Supplement: c9nr01510h1.pdf [file c9nr01510h1.pdf]

# Supplementary Information for: “Valence mediated tunable magnetism and electronic properties by ferroelectric polarization switching in 2D FeI<sub>2</sub>/In<sub>2</sub>Se<sub>3</sub> van der Waals heterostructures”

Wei Sun,<sup>†</sup> Wenxuan Wang,<sup>†</sup> Dong Chen,<sup>†</sup> Zhenxiang Cheng,<sup>\*,†,‡</sup> Yuanxu Wang,<sup>\*,†</sup>

<sup>†</sup> *Institute for Computational Materials Science, School of Physics and Electronics, Henan University, Kaifeng 475004, People’s Republic of China*

<sup>‡</sup> *Institute for Superconducting & Electronic Materials, Australian Institute of Innovative Materials, University of Wollongong, Innovation Campus, Squires Way, North Wollongong, NSW 2500, Australia*

## Part I. Relative energy of 6 different interface contact types

For the FeI<sub>2</sub>/In<sub>2</sub>Se<sub>3</sub> van der Waals heterostructure (HS), we constructed six different interfacial contact types and fully released the lattice constant in the *xy*-plane and spatial ion coordinates, as shown in Fig. S1. These types of relative energy ( $\Delta E$ ) and interfacial adsorption energy were calculated to confirm the most stable combination among them, as shown in Table S1. The interface adsorption energy of all structures that defined as  $E_{ad} = (E_{FeI_2/In_2Se_3} - E_{FeI_2} - E_{In_2Se_3})/A$ , where the  $E_{FeI_2/In_2Se_3}$  is the total energy of the HS,  $E_{FeI_2}$  and  $E_{In_2Se_3}$  represent the energy of the FeI<sub>2</sub> and In<sub>2</sub>Se<sub>3</sub> parts with the same supercell constant, respectively. In addition, the area of interface in the HS is indicated by *A*. The physical meaning of the equation is that the energy released by combining the FeI<sub>2</sub> and In<sub>2</sub>Se<sub>3</sub> part into a HS, which can describe the thermodynamic stability of the interface. Therefore, we calculated the interface adsorption energy, which ranges from −0.037 to −0.035 eV/Å<sup>2</sup>. These negative values show that all structures are stable. By comparing the

relative energies, we finally determined that type-4 was the most stable structure applied in the calculations below.

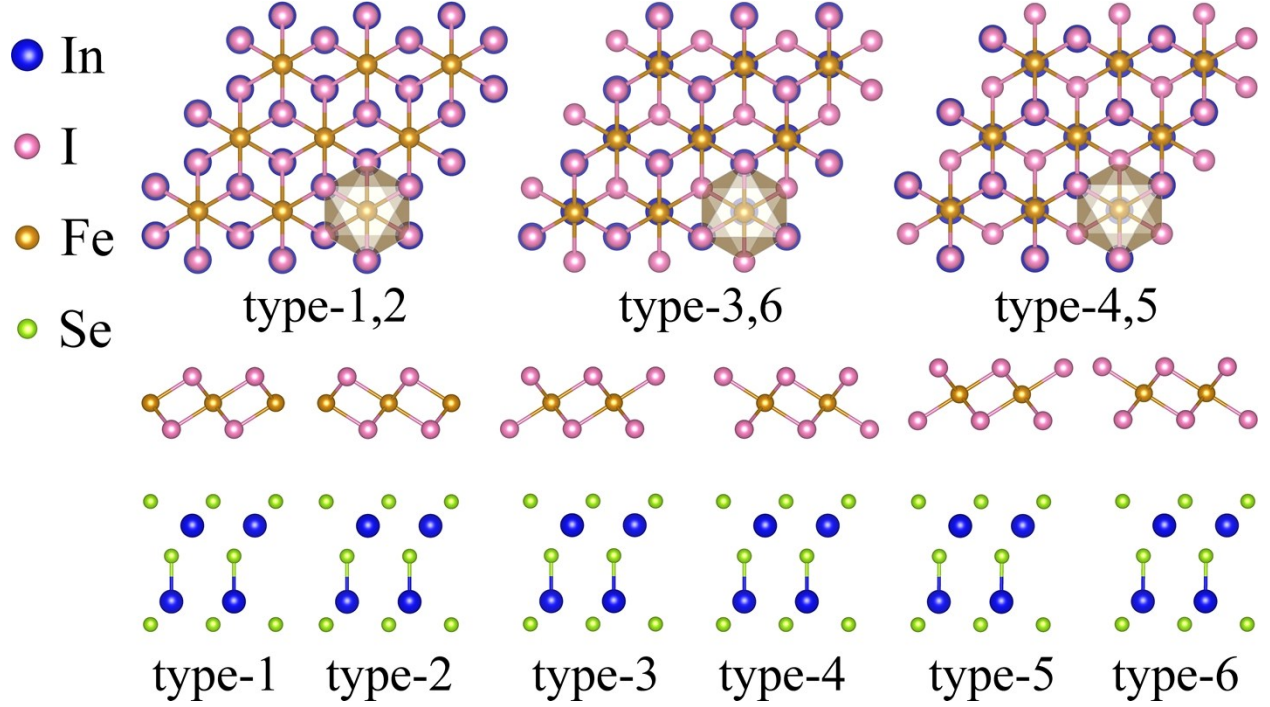

Fig. S1. Top view and side view of six different interfacial contact types for the  $\text{FeI}_2/\text{In}_2\text{Se}_3$  HS. The type- $m,n$  represents the top view of the type- $m$  and the type- $n$ .

Table S1. The relative energy ( $\Delta E$ , in eV) and interfacial adsorption energy ( $E_{\text{ad}}$ , in eV/Å<sup>2</sup>) of six different interfacial contact types for the  $\text{FeI}_2/\text{In}_2\text{Se}_3$  HS.

|                 | type-1 | type-2 | type-3 | type-4 | type-5 | type-6 |
|-----------------|--------|--------|--------|--------|--------|--------|
| $\Delta E$      | 0.018  | 0.018  | 0.002  | 0.000  | 0.097  | 0.082  |
| $E_{\text{ad}}$ | -0.037 | -0.037 | -0.037 | -0.037 | -0.035 | -0.036 |

## Part II. The layer-resolved partial DOS of the $\text{FeI}_2/\text{bilayer In}_2\text{Se}_3$ HS

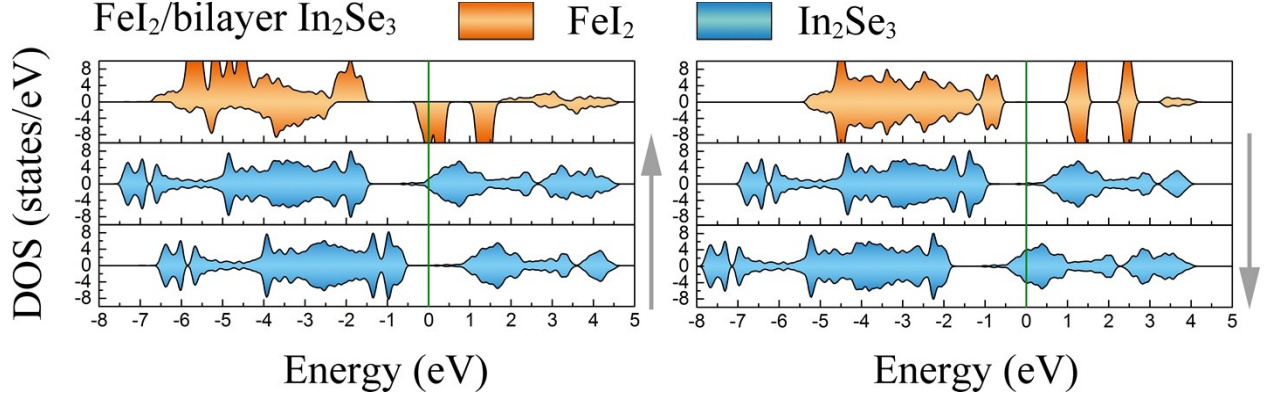

Fig. S2. The layer-resolved partial DOS of the  $\text{FeI}_2/\text{bilayer In}_2\text{Se}_3$  HS. The gray arrow represents the direction of polarization.

### Part III. The layer-resolved partial DOS of the $\text{MnI}_2/\text{In}_2\text{Se}_3$ and $\text{CoI}_2/\text{In}_2\text{Se}_3$ HS

We also calculated  $\text{MnI}_2/\text{In}_2\text{Se}_3$  HS and  $\text{CoI}_2/\text{In}_2\text{Se}_3$  HS, and their layer-resolved partial DOS is shown in Fig. S3. We found that they have the same conclusion as  $\text{FeI}_2/\text{In}_2\text{Se}_3$  HS, that is, in the  $+P$  case, the HS exhibits Ferromagnetic ordering, when it reverses to  $-P$  case, the magnetic ordering changes from Ferromagnetic to antiferromagnetic ordering.

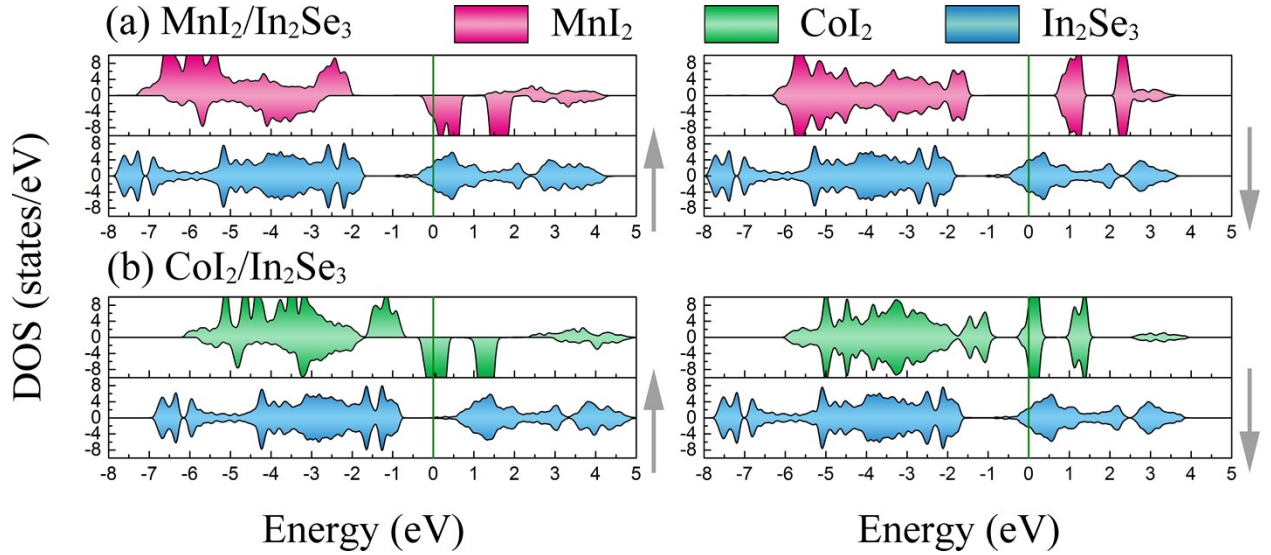

Fig. S3. The layer-resolved partial DOS of the  $\text{MnI}_2/\text{In}_2\text{Se}_3$  and  $\text{CoI}_2/\text{In}_2\text{Se}_3$  HS. The gray arrow represents the direction of polarization.
